# Supplementary material
Source: PubMed Central journal article supplement (PMC3748999)
Supplement: NIHMS364422-supplement-1_si_001.pdf [file NIHMS364422-supplement-1_si_001.pdf]

Supporting information for:

Assessing the Location of Surface Plasmons over  
Nanotriangle and Nanohole Arrays of different size and  
periodicity

*Debby Correia-Ledo<sup>a</sup>, Kirsty F. Gibson<sup>b</sup>, Anuj Dhawan<sup>cde</sup>, Maxime Couture<sup>a</sup>, Tuan Vo-Dinh<sup>d,e,f</sup>, Duncan  
Graham<sup>b</sup>, and Jean-Francois Masson,<sup>ag\*</sup>*

<sup>a</sup> Department of Chemistry, Universite de Montreal, C.P. 6128 Succ. Centre-Ville, Montreal, Quebec  
(Canada), H3C 3J7.

<sup>b</sup> Centre for Molecular Nanometrology, WestCHEM, Department of Pure and Applied Chemistry,  
University of Strathclyde, Glasgow (United Kingdom), G1 1XL.

<sup>c</sup> Department of Electrical Engineering, Indian Institute of Technology-Delhi, New Delhi (India)  
110016.

<sup>d</sup> Department of Biomedical Engineering, Duke University, Durham, North Carolina (USA), 27708.

<sup>e</sup> Fitzpatrick Institute for Photonics, Duke University, Durham, North Caroline (USA), 27708-0281.

<sup>f</sup> Department of Chemistry, Duke University, Durham, NC (USA), 27708.

<sup>g</sup> Centre for self-assembled chemical structures (CSACS).

Table S1. Raman imaging at a 532 nm excitation wavelength for nanohole arrays designed by NSL with 125 nm Ag film as a function of the diameter/periodicity (D/P) ratio.

|         | Nanotriangle<br>D/P = 1.0 | Transition state<br>0.75 > D/P > 0.6 |  |  | Nanohole<br>D/P < 0.6 |  |  |
|---------|---------------------------|--------------------------------------|--|--|-----------------------|--|--|
| 650 nm  |                           |                                      |  |  |                       |  |  |
| 820 nm  |                           |                                      |  |  |                       |  |  |
| 1000 nm |                           |                                      |  |  |                       |  |  |
| 1500 nm |                           |                                      |  |  |                       |  |  |
| FDTD    |                           |                                      |  |  |                       |  |  |



Table S2. Raman imaging at a 633 nm excitation wavelength for nanohole arrays designed by NSL with 125 nm Ag film as a function of the diameter/periodicity (D/P) ratio.

|                | <b>Nanotriangle</b><br><b>D/P = 1.0</b>                                                                                                  | <b>Transition state</b><br><b>0.75 &gt; D/P &gt; 0.6</b>                                                                                 |                                                                                                                                          |                                                                                                                                            | <b>Nanohole</b><br><b>D/P &lt; 0.6</b>                                                                                                     |                                                                                                                                            |                                                                                       |  |
|----------------|------------------------------------------------------------------------------------------------------------------------------------------|------------------------------------------------------------------------------------------------------------------------------------------|------------------------------------------------------------------------------------------------------------------------------------------|--------------------------------------------------------------------------------------------------------------------------------------------|--------------------------------------------------------------------------------------------------------------------------------------------|--------------------------------------------------------------------------------------------------------------------------------------------|---------------------------------------------------------------------------------------|--|
| <b>650 nm</b>  | 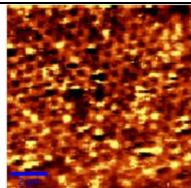                                                        |                                                         |                                                         |                                                         |                                                         |                                                         |                                                                                       |  |
| <b>820 nm</b>  |                                                         |                                                         |                                                         |                                                         |                                                         |                                                         |    |  |
| <b>1000 nm</b> |                                                        |                                                        |                                                        |                                                        |                                                        |                                                        |   |  |
| <b>1500 nm</b> |                                                       |                                                       |                                                       |                                                       |                                                       |                                                       |  |  |
| <b>FDTD</b>    | <br>Ey @ c17.4307um [Mesh#1] [0.-0.002,0.152] 4.40712 | <br>Ey @ c17.4307um [Mesh#1] [0.-0.002,0.152] 1.32315 | <br>Ey @ c17.4307um [Mesh#1] [0.-0.002,0.152] 1.36636 | <br>Ey @ c17.4307um [Mesh#1] [0.-0.002,0.152] 1.55222 | <br>Ey @ c17.4307um [Mesh#1] [0.-0.002,0.152] 1.52222 | <br>Ey @ c17.4307um [Mesh#1] [0.-0.002,0.152] 1.22841 |                                                                                       |  |

Figure S1. SEM image for nanohole arrays fabricated from NSL masks for a periodicity of 1500 nm with a 125 nm Au layer etched for 15 minutes under oxygen plasma.

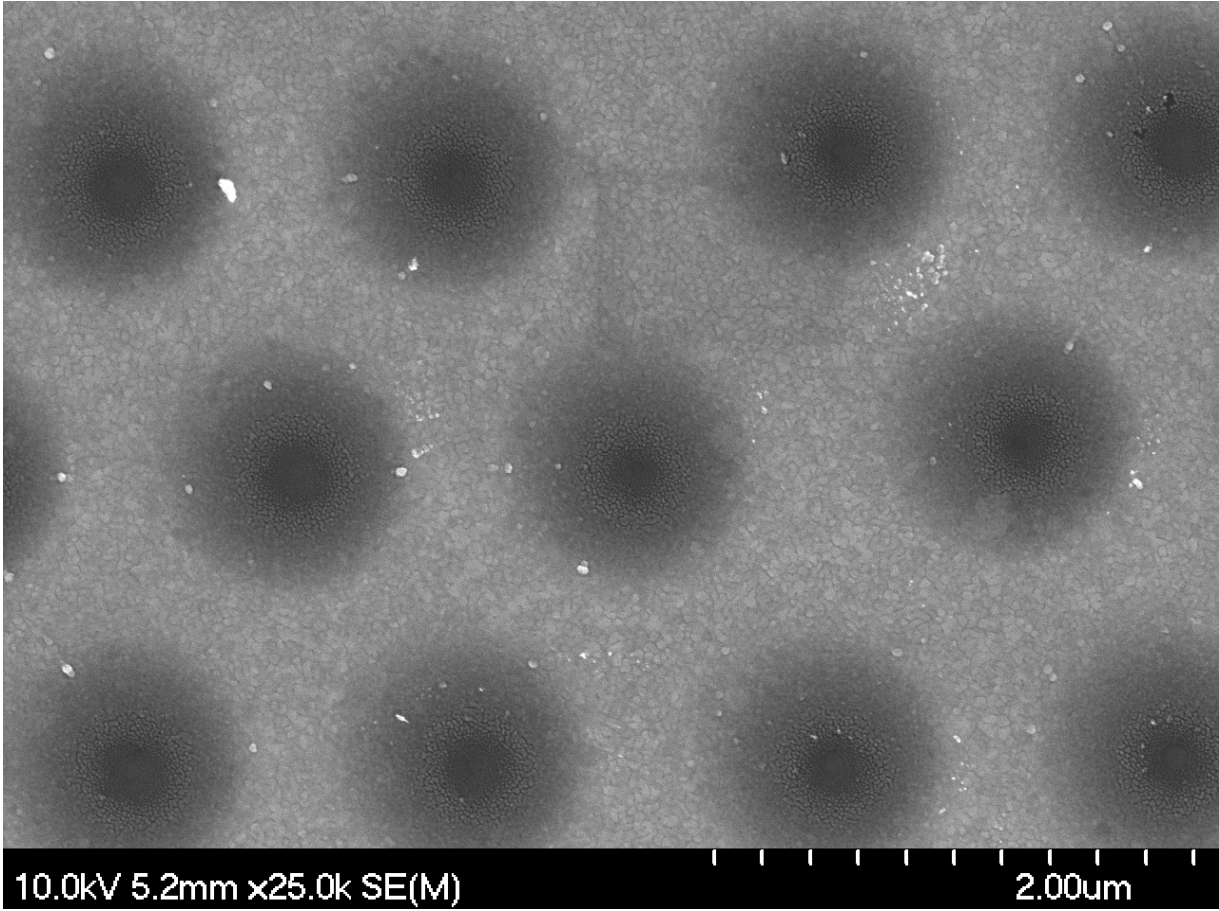

Table S3. Composition of the nanosphere solutions and drop size used for the drop coating.

|                                       | <b>Periodicities</b> |               |                |                |
|---------------------------------------|----------------------|---------------|----------------|----------------|
|                                       | <b>650 nm</b>        | <b>820 nm</b> | <b>1000 nm</b> | <b>1500 nm</b> |
| <b>Water (μL)</b>                     | 720                  | 200           | 200            | 25             |
| <b>Ethanol (μL)</b>                   | 160                  | 100           | 100            | 25             |
| <b>Nanosphere stock solution (μL)</b> | 120                  | 37            | 45             | 45             |
| <b>Drop size (μL)</b>                 | 37                   | 35            | 37             | 40             |
